# Supplementary material for: Anaplastic thyroid cancer cells reduce CD71 levels to increase iron overload tolerance
Source: PubMed Central journal article supplement (PMC10625232; doi:10.1186/s12967-023-04664-9), 2023-11-03
Supplement: 12967_2023_4664_MOESM1_ESM.pdf [file 12967_2023_4664_MOESM1_ESM.pdf]

|                           | FTC-133 |                |                 | 8505C  |                |                 |
|---------------------------|---------|----------------|-----------------|--------|----------------|-----------------|
|                           | CTRL    | 50 $\mu$ M FAC | 100 $\mu$ M FAC | CTRL   | 50 $\mu$ M FAC | 100 $\mu$ M FAC |
| <b>Mean</b>               | 100.00  | 42.68          | 24.24           | 100.00 | 13.66          | 3.36            |
| <b>Std. Deviation</b>     | 41.70   | 11.06          | 10.96           | 7.57   | 4.02           | 1.37            |
| <b>Std. Error of Mean</b> | 17.02   | 4.52           | 4.47            | 3.39   | 1.80           | 0.61            |

**Table S1.** Descriptive statistics for the S.F. (% over CTRL) observed in FTC-133 and 8505C cells, after treatment with 0, 50, 100  $\mu$ M of FAC. S.F., surviving fraction; CTRL, control; FAC, ferric ammonium citrate.

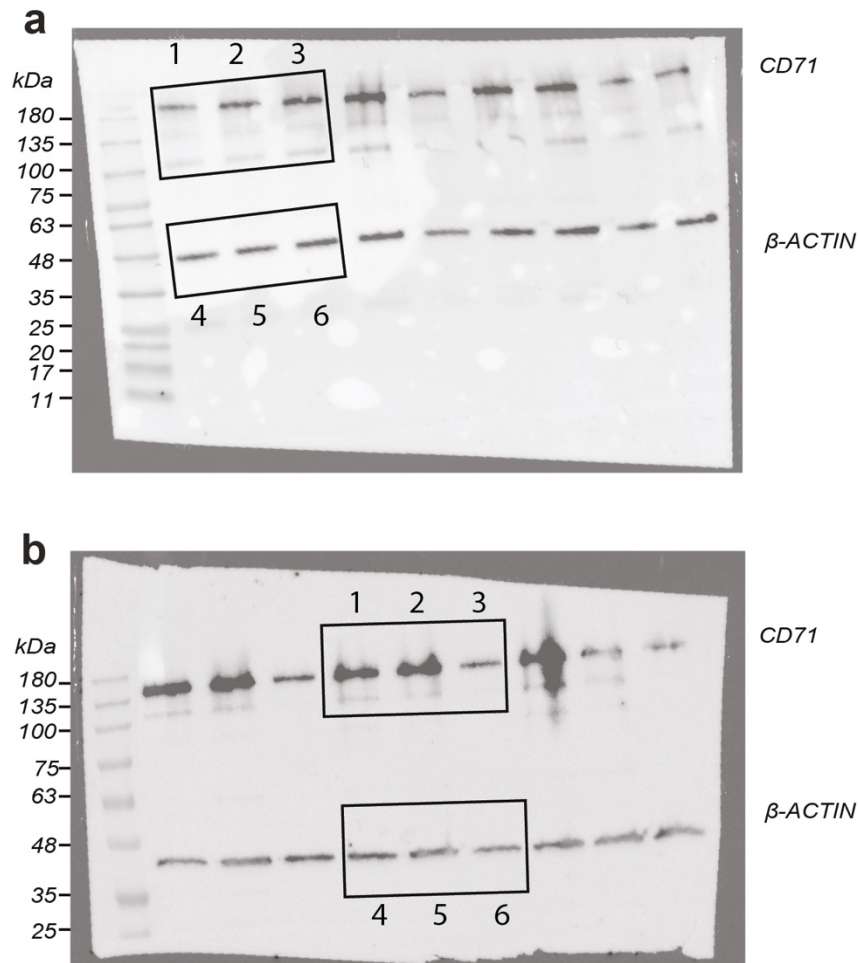

**Fig. S1** Original, uncropped western blot images showed in Figure 8 for FTC-133 (a) and for 8505C (b). Samples are indicated as a1 = CD71 FTC-133 CTRL; a2 = CD71 FTC-133 50  $\mu$ m FAC; a3 = CD71 FTC-133 100  $\mu$ m FAC; a4 =  $\beta$ -ACTIN FTC-133 CTRL; a5 =  $\beta$ -ACTIN FTC-133 50  $\mu$ m FAC; a6 =  $\beta$ -ACTIN FTC-133 100  $\mu$ m FAC; b1 = CD71 8505C CTRL; b2 = CD71 8505C 50  $\mu$ m FAC; b3 = CD71 8505C 100  $\mu$ m FAC; b4 =  $\beta$ -ACTIN 8505C CTRL; b5 =  $\beta$ -ACTIN 8505C 50  $\mu$ m FAC; b6 =  $\beta$ -ACTIN 8505C 100  $\mu$ m FAC.
